# Supplementary material for: Performance limit of monolayer MoSi2N4 transistors
Source: Royal Society of Chemistry journal article supplement (doi:10.1039/d1tc02937a), 2021-01-01
Supplement: d1tc02937a1.pdf [file d1tc02937a1.pdf]

# Supporting Information

## Performance limit of Monolayer MoSi<sub>2</sub>N<sub>4</sub> Transistors

Xiaotian Sun<sup>1†\*</sup>, Zhigang Song<sup>2†\*</sup>, Nannan Huo<sup>1</sup>, Shiqi Liu,<sup>3</sup> Chen Yang,<sup>3</sup> Jie Yang,<sup>3</sup> Weizhou Wang<sup>1\*</sup>, Jing Lu<sup>3,4,5,6\*</sup>

<sup>1</sup>College of Chemistry and Chemical Engineering, and Henan Key Laboratory of Function-Oriented Porous Materials, Luoyang Normal University, Luoyang 471934, P. R. China

<sup>2</sup>Computational Research Division, Lawrence Berkeley National Laboratory, Berkeley, California 94720, U. S. A

<sup>3</sup>State Key Laboratory for Mesoscopic Physics and Department of Physics, Peking University, Beijing 100871, P. R. China

<sup>4</sup>Collaborative Innovation Center of Quantum Matter, Beijing 100871, P. R. China

<sup>5</sup>Beijing Key Laboratory for Magnetoelectric Materials and Devices (BKL-MEMD), Beijing 100871, P. R. China

<sup>6</sup>Peking University Yangtze Delta Institute of Optoelectronics Peking University, Nantong 226010, P. R. China

†These authors contributed equally to this work.

Email: sxt@lynu.edu.cn, zhigangsong@lbl.gov, wzw@lynu.edu.cn, jinglu@pku.edu.cn

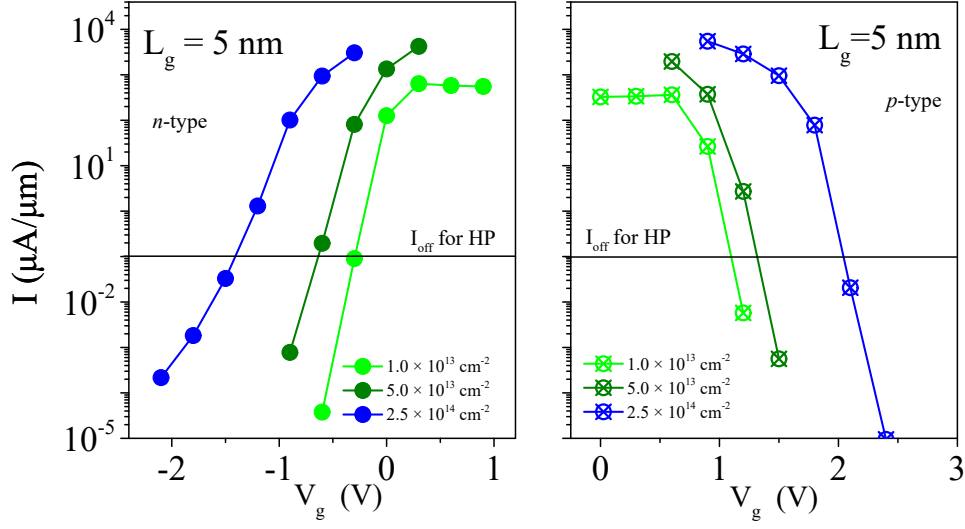

**Figure S1.** Transfer characteristics of *n*-type and *p*-type ML MoSi<sub>2</sub>N<sub>4</sub> DG MOSFET with  $L_g = 5$  nm and  $L_{ul} = 0$  nm at different doping concentration.

**Table S1.** The  $I_{on}$ s of *n/p*-type ML MoSi<sub>2</sub>N<sub>4</sub> DG MOSFET with  $L_g = 5$  nm by different source and drain

| $L_g$ | Hole/electron-doping (/cm <sup>2</sup> ) | $I_{on}$ of <i>n</i> -type (μA/μm) | $I_{on}$ of <i>p</i> -type (μA/μm) | doping concentration hole are listed below. |
|-------|------------------------------------------|------------------------------------|------------------------------------|---------------------------------------------|
| 5 nm  | $1.0 \times 10^{13}$                     | 636                                | 359                                |                                             |
|       | $5.0 \times 10^{13}$                     | 1382                               | 1343                               |                                             |
|       | $2.5 \times 10^{14}$                     | 293                                | 1322                               |                                             |

From the test results, the  $I_{on}$ s of the 5 nm gate-length *n*-type and *p*-type ML MoSi<sub>2</sub>N<sub>4</sub> DG MOSFET are the largest at the doping concentration of  $5.0 \times 10^{13}$  cm<sup>-2</sup>. In terms of the maximum on-current, we choose  $5.0 \times 10^{13}$  cm<sup>-2</sup> as the optimum doping concentration.

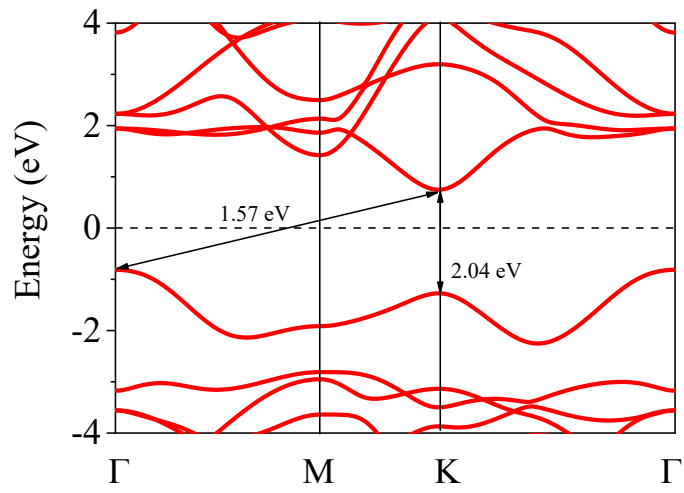

**Figure S2.** Band structure of monolayer MoSi<sub>2</sub>N<sub>4</sub>.

**Table S2.** Comparison of  $I_{on}$ ,  $SS$ , delay time, and power dissipation in  $n/p$ -type ML  $\text{MoSi}_2\text{N}_4$  DG MOSFET without and with NC layers.

| $\square$      | $L_g$ (nm)     | $L_{ul}$ (nm) | $I_{on}$ ( $\mu\text{A}/\mu\text{m}$ ) for HP |         | $I_{on}$ ( $\mu\text{A}/\mu\text{m}$ ) for LP |         | SS (mV/dec) |           |     |
|----------------|----------------|---------------|-----------------------------------------------|---------|-----------------------------------------------|---------|-------------|-----------|-----|
|                |                |               | Without NC                                    | With NC | Without NC                                    | With NC | Without NC  | With NC   |     |
| <i>n</i> -type | 1              | 0             | -                                             | -       | -                                             | -       | 1044        | -         |     |
|                |                | 1             | -                                             | -       | -                                             | -       | 593         | -         |     |
|                |                | 2             | 59                                            | 753     | -                                             | -       | 209         | 138       |     |
|                |                | 3             | 318                                           | 994     | 1                                             | 23      | 144         | 104       |     |
|                |                | 4             | 490                                           | 1196    | 18                                            | 196     | 118         | 82        |     |
|                | 3              | 0             | 120                                           | 3405    | -                                             | -       | 176         | 105       |     |
|                |                | 1             | 470                                           | 2740    | -                                             | -       | 140         | 96        |     |
|                |                | 2             | 800                                           | 2193    | 20                                            | 301     | 97          | 76        |     |
|                |                | 3             | 1112                                          | 2288    | 163                                           | 831     | 80          | 68        |     |
|                | 5              | 0             | 1382                                          | 4751    | 2                                             | 294     | 115         | 73        |     |
|                |                | 1             | 1613                                          | 4325    | 114                                           | 1233    | 87          | 69        |     |
|                |                | 2             | 1813                                          | 4516    | 77                                            | 3540    | 69          | 30        |     |
|                | <i>p</i> -type | 1             | 0                                             | -       | -                                             | -       | -           | 377       | -   |
|                |                |               | 1                                             | 114     | 1872                                          | -       | -           | 179       | 104 |
|                |                |               | 2                                             | 290     | 1595                                          | 6       | 204         | 116       | 81  |
| 3              |                |               | 393                                           | 1162    | 25                                            | 307     | 79          | 73        |     |
| 4              |                |               | 362                                           | 783     | 46                                            | 259     | 59          | 44        |     |
| 3              |                | 0             | 573                                           | 2644    | 4                                             | 850     | 113         | 68        |     |
|                |                | 1             | 940                                           | 2941    | 67                                            | 1627    | 86          | 63        |     |
|                |                | 2             | 959                                           | 2644    | 249                                           | 1002    | 63          | 51        |     |
|                |                | 3             | 734                                           | 1463    | 252                                           | 523     | 47          | 40        |     |
| 5              |                | 0             | 1343                                          | 2956    | 213                                           | 2439    | 71          | 51        |     |
|                |                | 1             | 1690                                          | 2986    | 390                                           | 2004    | 46          | 38        |     |
|                |                | 2             | 1244                                          | 2488    | 378                                           | 1065    | 52          | 45        |     |
| ITRS           |                | 5.1           | $\square$                                     | 900     |                                               | 295     |             | $\square$ |     |

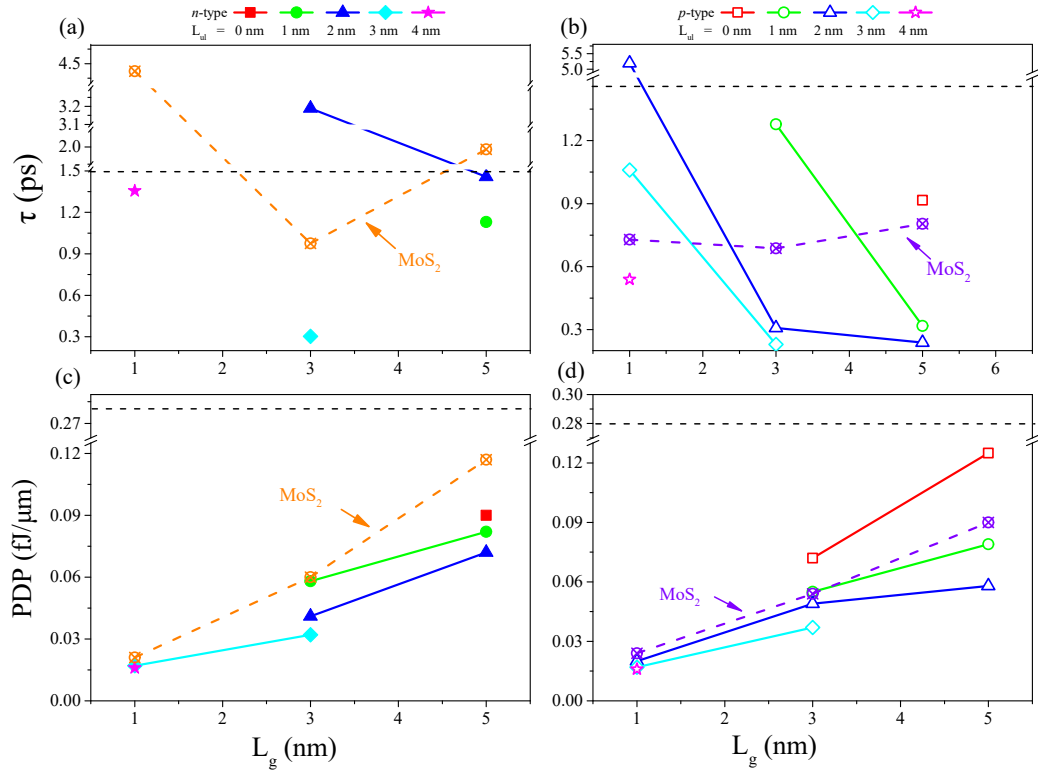

**Figure S3.** (a-b) Intrinsic delay time ( $\tau$ ) and (c-d) power dissipation (PDP) as a function of the gate length and underlap in DG ML MoSi<sub>2</sub>N<sub>4</sub> MOSFETs with  $L_{ul} = 0, 1, 2, 3,$  and  $4$  nm for LP applications, respectively. The optimum  $\tau$  and PDP of the  $n/p$  type DG ML MoS<sub>2</sub> counterpart for the LP device<sup>1</sup> are given by orange/purple dash line in each panel for the comparison, separately. Black dash lines are the ITRS LP requirements for  $\tau$  and PDP in 2028, respectively.

## Reference

1. Zhang, H.; Shi, B.; Xu, L.; Yan, J.; Zhao, W.; Zhang, Z.; Zhang, Z.; Lu, J., Sub-5 nm Monolayer MoS<sub>2</sub> Transistors toward Low-Power Devices. *ACS Appl. Electron. Mater.* **2021**, *3* (4), 1560-1571.
